# Supplementary material for: Half-metallic and magnetic semiconductor behavior in CdO monolayer induced by acceptor impurities
Source: Royal Society of Chemistry journal article supplement (doi:10.1039/d3cp01268a), 2023-01-01
Supplement: d3cp01268a1.pdf [file d3cp01268a1.pdf]

## Half-metallic and magnetic semiconductor natures in CdO monolayer induced by acceptor impurities

R. Ponce-Pérez,<sup>1</sup> J. Guerrero-Sanchez,<sup>1</sup> and D. M. Hoat<sup>2,3,\*</sup>

<sup>1</sup>*Universidad Nacional Autónoma de México, Centro de Nanociencias y Nanotecnología,  
Apartado Postal 14, Ensenada, Baja California, Código Postal 22800, Mexico*

<sup>2</sup>*Institute of Theoretical and Applied Research, Duy Tan University, Ha Noi 100000, Viet Nam*

<sup>3</sup>*Faculty of Natural Sciences, Duy Tan University, Da Nang 550000, Viet Nam*

\*Corresponding author: [dominhhoat@duytan.edu.vn](mailto:dominhhoat@duytan.edu.vn)

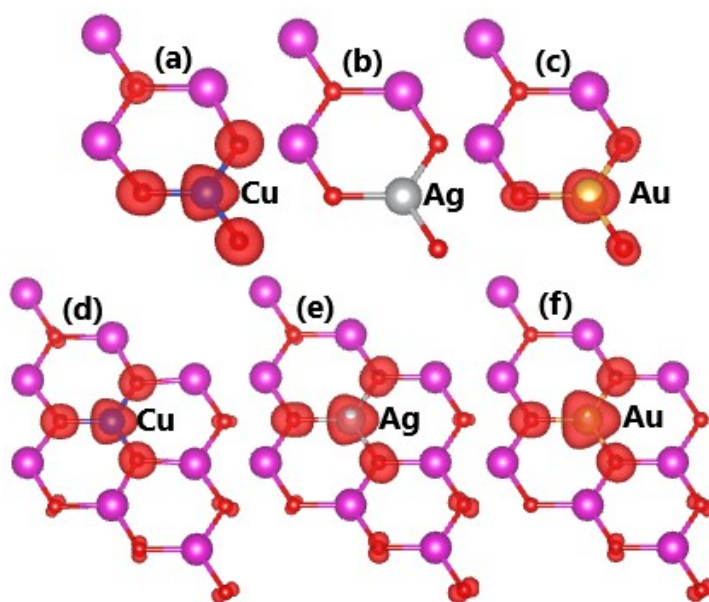

Figure S1: Spin density (Iso-surface value:  $0.004 e / \text{\AA}^3$ ) in CdO monolayer doped with 25%-11.11% of (a-d) Cu, (b-e) Ag, and (c-f) Au.

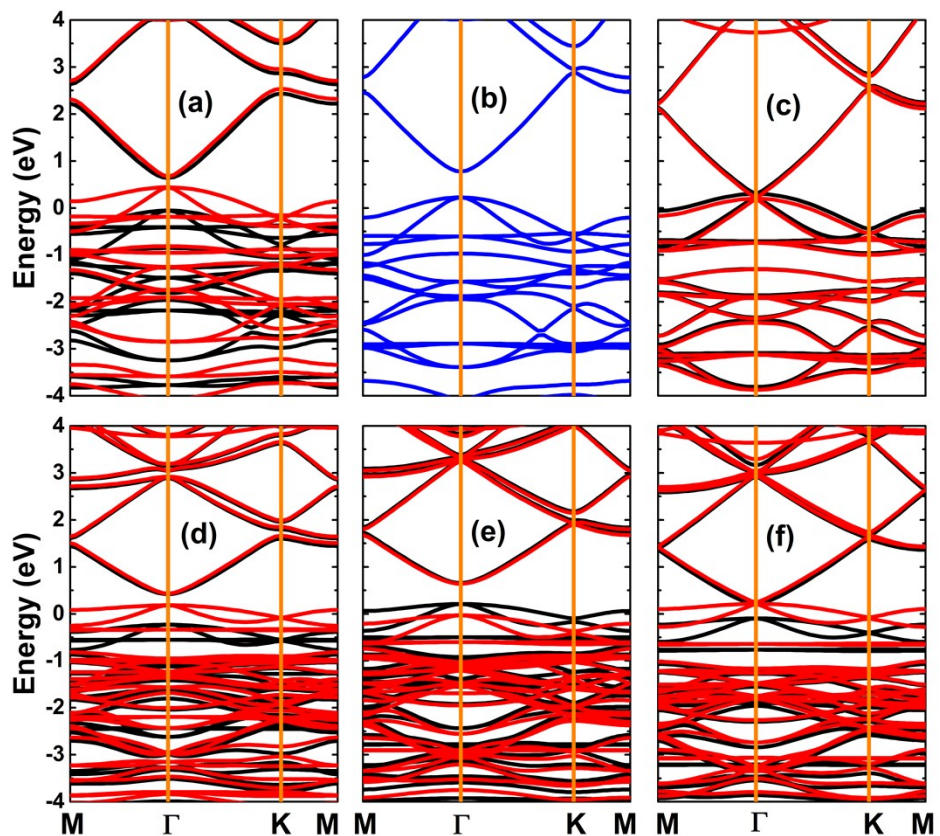

Figure S2: Spin-polarized band structure (Black curve: spin-up; Red curve: spin-down; Blue curve: non-spin-polarization; The Fermi level is set to 0 eV) of CdO monolayer doped with 25%-11.11% of (a-d) Cu, (b-e) Ag, and (c-f) Au.

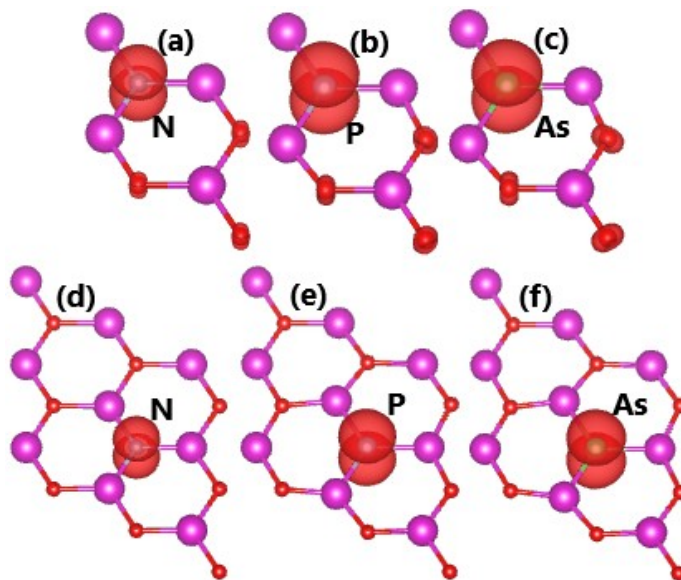

Figure S3: Spin density (Iso-surface value:  $0.004 e/\text{\AA}^3$ ) in CdO monolayer doped with 25%-11.11% of (a-d) N, (b-e) P, and (c-f) As.

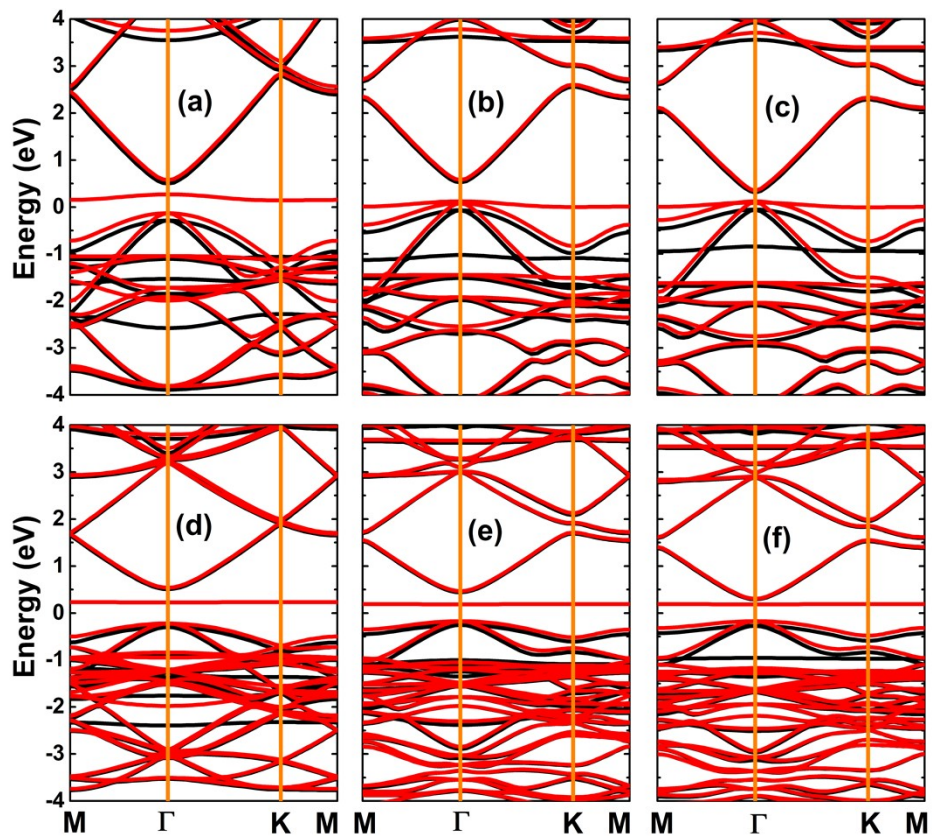

Figure S4: Spin-polarized band structure (Black curve: spin-up; Red curve: spin-down; Blue curve: non-spin-polarization; The Fermi level is set to 0 eV) of CdO monolayer doped with 25%-11.11% of (a-d) N, (b-e) P, and (c-f) As.
